# Supplementary material for: Mesenchymal Stem Cells in Early Entry of Breast Cancer into Bone Marrow
Source: PubMed Central journal article supplement (PMC2430536; doi:10.1371/journal.pone.0002563), 2008-06-25

Figure S1

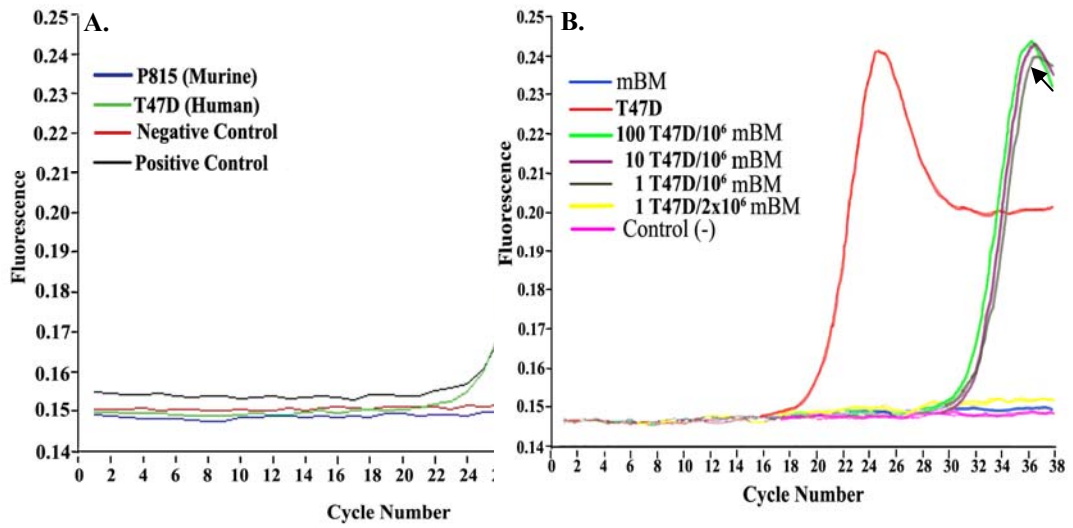

Supplement: pone.0002563.s002.pdf [file pone.0002563.s002.pdf]
