# Supplementary material for: Mesenchymal Stem Cells in Early Entry of Breast Cancer into Bone Marrow
Source: PLOS journal article supplement (doi:10.1371/journal.pone.0002563), 2008-06-24

Figure S4

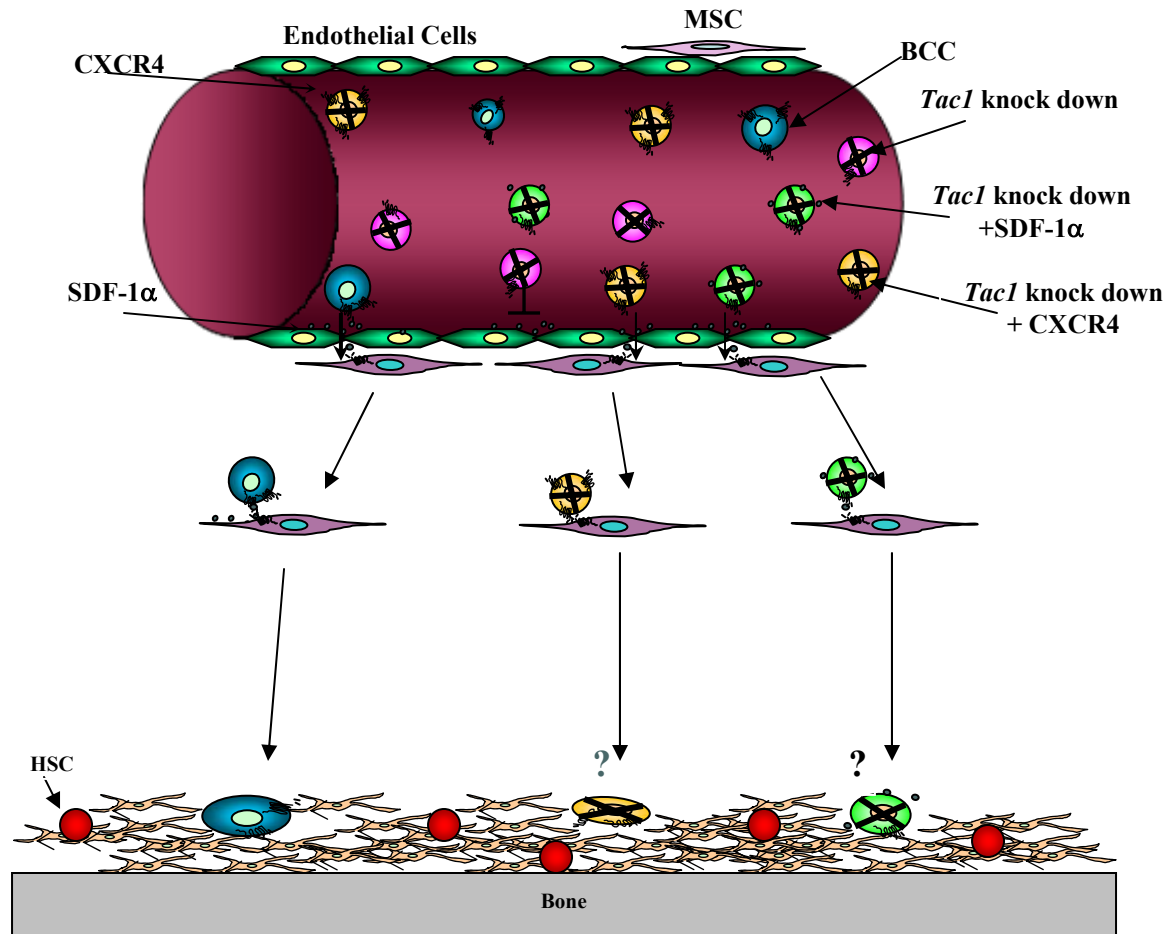

Supplement: S5 (10.1371/journal.pone.0002563.s005) [file journal.pone.0002563.s005]
